# Supplementary material for: Liquid Biopsy and Radiological Response Predict Outcomes Following Discontinuation of Targeted Therapy in Patients with BRAF Mutated Melanoma
Source: PubMed Central journal article supplement — Oncologist. 2021 Sep 21;26(12):1079–84. doi: 10.1002/onco.13926 (PMC8649022; doi:10.1002/onco.13926), 2021-09-21
Supplement: ONCO-26-1079-s001.pdf [file ONCO-26-1079-s001.pdf]

**Supplementary Table S1.** Clinical characteristics and ctDNA data of patients experiencing disease progression after discontinuation of BRAF inhibitor-based therapy.

| <i>BASELINE</i>                         |                                       | <i>ON-TREATMENT</i>        |                                    |                        |                      | <i>DISCONTINUATION</i> | <i>DISEASE PROGRESSION</i> |                        |                    |                | <i>RECHALLENGE</i>                    |                       |
|-----------------------------------------|---------------------------------------|----------------------------|------------------------------------|------------------------|----------------------|------------------------|----------------------------|------------------------|--------------------|----------------|---------------------------------------|-----------------------|
| <b>Baseline organ sites involvement</b> |                                       | <b>BRAFi-based therapy</b> | <b>Treatment duration (months)</b> | <b>Individual dPFS</b> | <b>Best Response</b> | <b>ctDNA</b>           | <b>New organ sites</b>     | <b>CNS involvement</b> | <b>LDH &gt;ULN</b> | <b>ECOG PS</b> | <b>Subsequent BRAF/MEK inhibitors</b> | <b>Dose reduction</b> |
| <b>ID4</b>                              | Liver                                 | V                          | 25.3                               | 12                     | CR                   | NA                     | Yes                        | No                     | No                 | 0              | D+T                                   | No                    |
| <b>ID6</b>                              | Lung, Soft tissues                    | V                          | 65.6                               | 3                      | CR                   | NA                     | No                         | No                     | No                 | 0              | D+T                                   | No                    |
| <b>ID9</b>                              | Lymph nodes, Soft tissues, CNS        | V                          | 57.2                               | 10                     | PR                   | -                      | No                         | No                     | No                 | 0              | No                                    | -                     |
| <b>ID11</b>                             | Lymph nodes                           | V                          | 60.3                               | 3                      | PR                   | +                      | No                         | No                     | No                 | 0              | V+C                                   | No                    |
| <b>ID13</b>                             | Lung                                  | V                          | 58.4                               | 2                      | CR                   | +                      | No                         | No                     | No                 | 0              | D+T                                   | No                    |
| <b>ID16</b>                             | Lung, Lymph nodes, Liver              | V+C                        | 13.3                               | 32                     | CR                   | +                      | No                         | No                     | No                 | 0              | No                                    | -                     |
| <b>ID17</b>                             | Lung, Lymph nodes                     | D+T                        | 46.6                               | 9                      | PR                   | NA                     | No                         | No                     | No                 | 0              | D+T                                   | No                    |
| <b>ID19</b>                             | Lymph nodes, Soft tissues, Peritoneum | D+T                        | 68.6                               | 16                     | CR                   | +                      | Yes                        | No                     | No                 | 0              | No                                    | -                     |
| <b>ID20</b>                             | Lymph nodes                           | D+T                        | 70                                 | 11                     | PR                   | +                      | No                         | No                     | Yes                | 0              | No                                    | -                     |
| <b>ID22</b>                             | Lung                                  | V                          | 88.4                               | 26                     | CR                   | +                      | No                         | No                     | No                 | 0              | V+C                                   | No                    |
| <b>ID24</b>                             | Soft tissues, CNS                     | V                          | 87.4                               | 21.4                   | PR                   | +                      | No                         | No                     | No                 | 0              | No                                    | -                     |

*Abbreviations.* CNS: central nervous system. CR: complete response. ctDNA: circulating tumor DNA. D+T: dabrafenib in combination with trametinib.

dPFS: post discontinuation progression-free survival. NA: not available. PR: partial response. ULN: upper limit normal. V: vemurafenib. V+C:

vemurafenib in combination with cobimetinib.
